# Supplementary material
Source: PubMed Central journal article supplement (PMC3421989)
Supplement: supp_ers134_00080267-file001.pdf [file supp_ers134_00080267-file001.pdf]

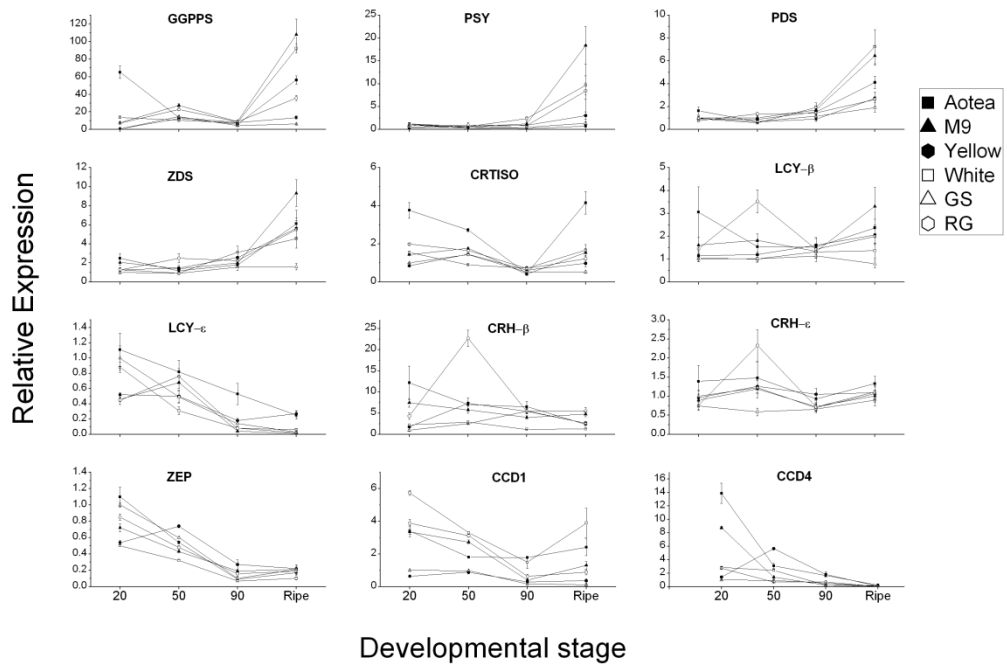

**Fig. S1.** Expression of apple carotenoid biosynthetic genes in fruit skin of different apple genotypes measured at 20, 50, 90 DAFB and ripe fruit stages. Gene expression was measured relative to *actin*. Error bars are standard errors of the mean from 4 technical replicates.

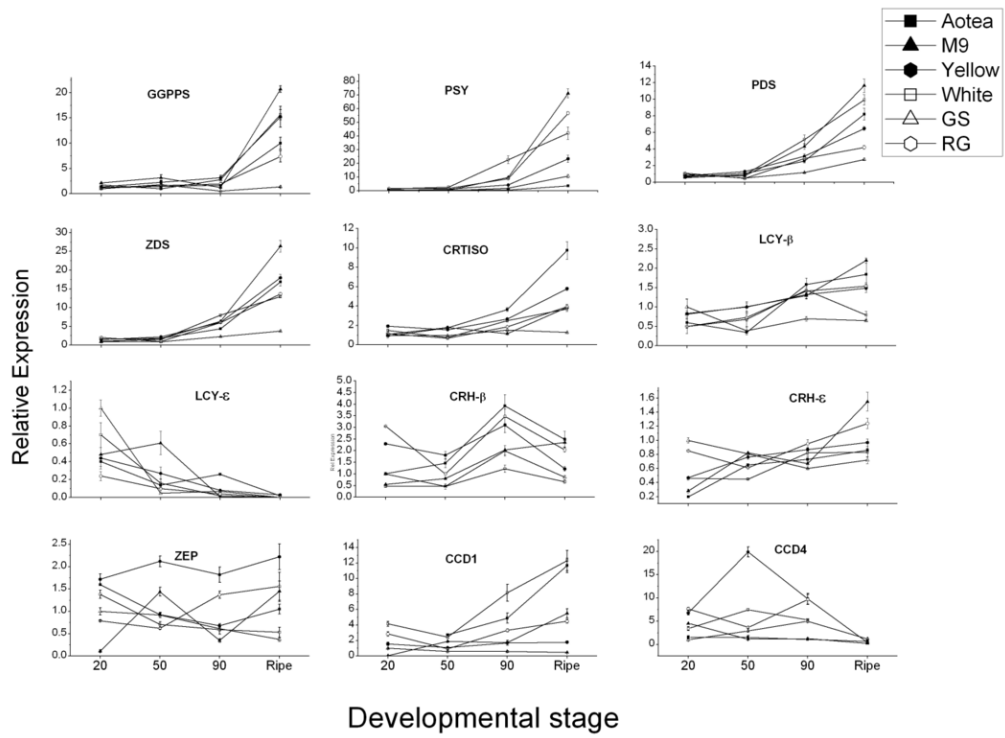

**Fig. S2.** Expression of apple carotenoid biosynthetic genes in fruit flesh of different apple genotypes measured at 20, 50, 90 DAFB and ripe fruit stages. Gene expression was measured relative to *actin*. Error bars are standard errors of the mean from 4 technical replicates.

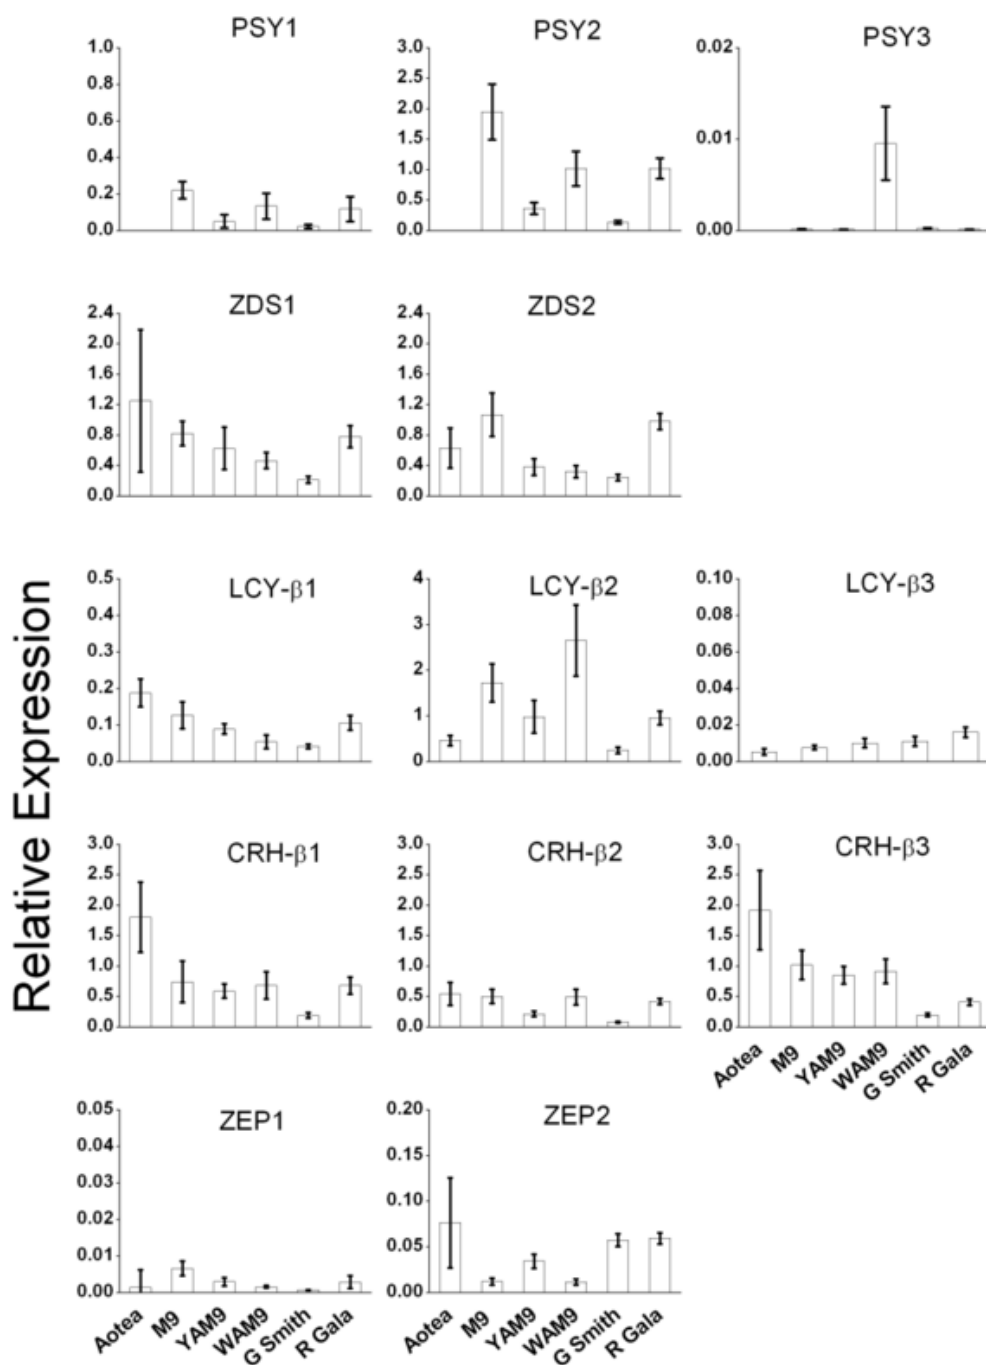

**Fig. S3.** Expression of apple carotenoid gene homologs, using gene specific primers, in ripe fruit skin of different apple genotypes. Gene expression was measured relative to the apple *actin* gene and the error bars represent standard errors of the mean from 4 technical replicates.

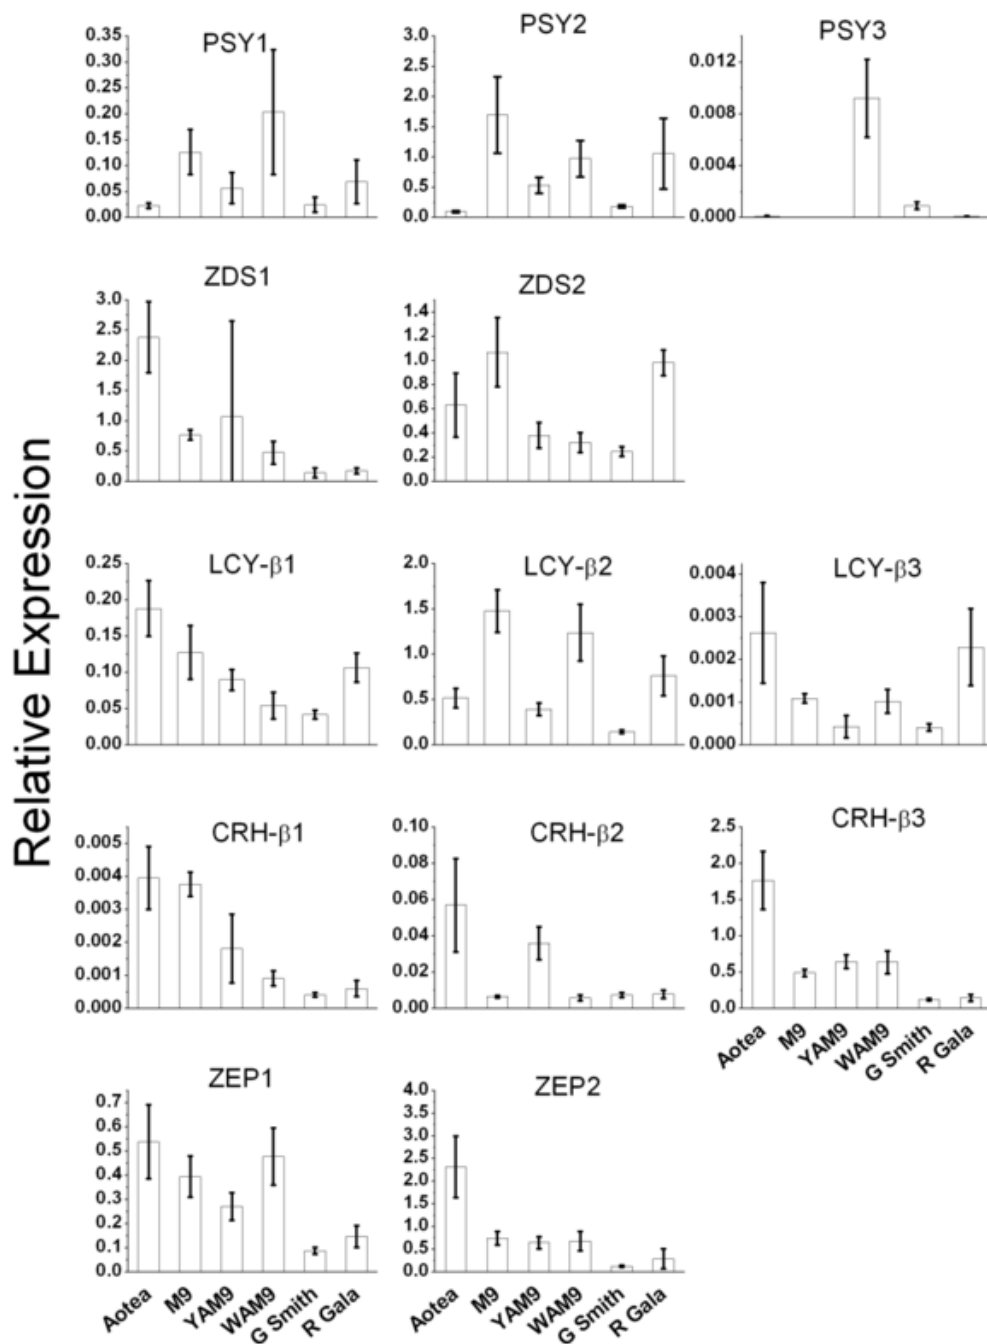

**Fig. S4.** Expression of apple carotenoid gene homologs, using gene specific primers, in ripe fruit flesh of different apple genotypes. Gene expression was measured relative to the apple *actin* gene and the error bars represent standard errors of the mean from 4 technical replicates.

Table S1. Primers used in quantitative PCR measurements were designed using PRIMER3 software with a stringent set of conditions

| <b>Name of primer</b> | <b>Sequence (5'-3')</b>     |
|-----------------------|-----------------------------|
| MdACTIN F             | TGACCGAATGAGCAAGGAAATTACT   |
| MdACTIN R             | TACTCAGCTTTGGCAATCCACATC    |
| MdGGPS F              | ACCCCCTCAAACCACCATAC        |
| MdGGPS R              | CCTCTGTGAGGGTCTCTTGCTT      |
| MdPSY F               | CAGAGACATGGTAGAAGGAATGAG    |
| MdPSY R               | CCAACAGTTCAGCAACATAGTAG     |
| MdPSY1 F              | GAGAAGGTGTATGAAGTGGTGCTG    |
| MdPSY1 R              | TTCAAACCTTCAGTAATCCGTTCA    |
| MdPSY2 F              | GAGAAGATGCTAGGAGAGGAAGAGT   |
| MdPSY2 R              | CTTTGCCACTTGTGTCAGTCACCTTCC |
| MdPSY3 F              | GAAGCATATGAGAGGTGCAAGAAC    |
| MdPSY3 R              | AGTTCATCTGTCCTCCTACACCAA    |
| MdPDS F               | ACAAGACTGTACCAGGTTGTGAAC    |
| MdPDS R               | GCTCCTTCCATTGAGGCTAAATAC    |
| MdZISO F              | GGTAATATGGTGCCTGGCTCACACGAT |
| MdZISO R              | CTCCTGTCACCATTCCAAGCACCAA   |
| MdZDS F               | CCAAGGTTTAGAAGTCACTTGGTC    |
| MdZDS R               | CAGGTGTCTTCTGATCAGGTCTAA    |
| MdZDS1 F              | CAAAGAGGTCCTCCTCCTTCTGG     |
| MdZDS1 R              | GGTAGAACTCTGGTTCAGGTGGAA    |
| MdZDS2 F              | TCCAGTAACCGGTCGCTGTATAGT    |
| MdZDS2 R              | CGTTAACCCCATGTCAGAAAC       |
| MdCRITSO F            | TCACTTGAGGAGCCAATCTACC      |
| MdCRTISO R            | GCGAGCTATATCCCCAGCATT       |
| MdLCYB F              | AGTTCGGTACCTTGGTTCAGATAG    |
| MdLCYB R              | ACAGAAGAACTCCCTTTGTCTCCT    |
| MdLCYB1 F             | GCTAGTAGCAGTGCTCTTCTGGAG    |
| MdLCYB1 R             | CTAGGTCCACAACAAGACCCTTTG    |
| MdLCYB2 F             | CTTGATCCTTATTACTGGCAAGG     |
| MdLCYB2 R             | ATATCAAACCTAGATGGGGTGGAG    |
| MdLCYB3 F             | CTCAAGACTCTGTTGTTGGAGAGG    |
| MdLCYB3 R             | CGCACAGAATAGAGGACTCGAACT    |
| MdLCYE F              | CGGAGCCACTATGATTAGAACCTA    |
| MdLCYE R              | AGTGACCTTCAAAGTAGGCAGTG     |
| MdCRHB F              | AGTCCTCCTACGTCATTCCAAAAC    |
| MdCRHB R              | CCATCACTACATAGACGGTGAAAC    |
| MdCRHB1 F             | ACCTTCTAGGCTAAGCTCCACTCC    |
| MdCRHB1 R             | GATGTCGACAGAATCAGGCTCTC     |
| MdCRHB2 F             | GAGCTCTCTGCTCGGATTTCTT      |
| MdCRHB2 R             | CTAGTAGCCCAGTAGGAACACCAA    |
| MdCRHB3 F             | CAGCTGCAGTCTTAACATGGACGT    |

|           |                          |
|-----------|--------------------------|
| MdCRHB3 R | GTTGGAAATCTATCGCCTAGAACG |
| MdCRHE F  | GGTTCCGGATCAGAAAATTAGC   |
| MdCRHE R  | ACGAAGACGAGGATGATGTAGC   |
| MdZEP F   | CTTGAAGGAAGGTCACCCAGTT   |
| MdZEP R   | CACTCTCCGGTCAATAGCACAC   |
| MdZEP1 F  | CCACAGCCCAGTCTACTCTTAATC |
| MdZEP1 R  | CTCATTCCCCAAGCAAGAGCTA   |
| MdZEP2 F  | GGTTGTGTTACTGGGGATAGGA   |
| MdZEP2 R  | TTCCACTGCAGGAGTGAATGTA   |
| MdVDE F   | GTCGAAGTTCAACGGAAAGTGG   |
| MdVDE R   | CTCCAGGACAAGTTCCTACAAG   |
| MdCCD1 F  | GCACCAGTTGCTGGATATCACT   |
| MdCCD1 R  | GTGACGTCCTAACGTAGCGAGA   |
| MdCCD4 F  | CTCCGCTATGGCTTTATACGG    |
| MdCCD4 R  | AGTCATGGAGGAACGTTGGAGT   |

Table S2. Carotenoid concentrations ( $\mu\text{g/g}$  FW) in apple fruit flesh measured by HPLC analysis at 20, 50, 90 DAFB and ripe fruit stages. Concentrations were determined as beta-carotene equivalents per gram fresh weight of tissue.

| Apple fruit cultivar and developmental stages |       |       |      |       |       |      |      |      |       |       |      |      |       |      |      |      |              |      |      |      |            |      |      |      |
|-----------------------------------------------|-------|-------|------|-------|-------|------|------|------|-------|-------|------|------|-------|------|------|------|--------------|------|------|------|------------|------|------|------|
| Compound                                      | Aotea |       |      |       | M9    |      |      |      | YAM9  |       |      |      | WAM9  |      |      |      | Granny Smith |      |      |      | Royal Gala |      |      |      |
|                                               | 20    | 50    | 90   | Ripe  | 20    | 50   | 90   | Ripe | 20    | 50    | 90   | Ripe | 20    | 50   | 90   | Ripe | 20           | 50   | 90   | Ripe | 20         | 50   | 90   | Ripe |
| Neoxanthin isomer                             | 0.79  |       |      | 3.40  |       |      | 0.22 | 0.35 |       |       |      | 2.35 |       |      |      |      |              |      |      |      |            |      |      | 0.51 |
| Neoxanthin                                    | 3.86  | 2.11  | 0.71 | 2.35  | 3.29  | 0.97 | 0.19 | 0.31 | 1.63  | 0.98  | 0.26 | 1.66 | 1.43  | 0.37 | 0.25 | 0.16 | 1.80         | 0.55 | 0.21 | 0.17 | 3.46       | 0.50 | 0.15 | 0.29 |
| Violaxanthin                                  | 0.87  |       | 0.24 | 3.13  |       |      |      |      |       |       |      | 1.96 |       |      |      | 0.16 |              |      |      |      |            |      |      | 0.54 |
| Luteoxanthin                                  |       |       |      | 1.93  |       |      |      |      |       |       |      | 0.36 |       |      |      | 0.18 |              |      |      |      |            |      |      | 0.20 |
| Lutein                                        | 12.05 | 6.03  | 2.18 |       | 5.99  | 1.62 | 0.20 | 0.28 | 6.55  | 3.59  | 0.71 |      | 6.59  | 1.88 | 0.55 |      | 5.08         | 2.35 | 0.89 | 0.28 | 6.30       | 0.90 | 0.39 |      |
| Zeaxanthin                                    |       |       |      | 0.47  |       |      |      |      |       |       |      |      |       |      |      |      |              | 0.30 |      |      |            |      |      | 0.14 |
| $\beta$ -cryptoxanthin                        |       |       |      | 6.42  |       |      |      |      |       |       |      | 0.32 |       |      |      |      |              |      |      |      |            |      |      |      |
| $\beta$ -carotene                             | 6.37  | 3.06  | 0.98 | 5.06  | 3.73  | 0.96 | 0.14 | 0.17 | 3.59  | 2.11  | 0.33 | 0.60 | 3.96  | 1.21 | 0.37 | 0.15 | 2.55         | 1.16 | 0.44 | 0.17 | 3.40       | 0.55 | 0.28 |      |
| cis $\beta$ -carotene                         | 1.27  | 1.45  | 0.27 | 0.46  | 0.99  | 0.37 |      |      | 1.16  | 0.98  |      | 0.19 | 0.96  | 0.34 |      |      | 0.70         | 0.37 | 0.16 |      | 1.02       |      |      |      |
| Other carotenoids                             | 4.02  | 2.64  | 1.34 | 6.44  | 3.42  | 0.89 | 0.24 | 0.38 | 1.93  | 1.32  | 0.38 | 1.31 | 1.79  | 0.52 |      | 0.16 | 2.46         | 1.03 | 0.26 | 0.19 | 3.78       | 0.52 | 0.19 | 0.25 |
| Total carotenoid                              | 29.23 | 15.28 | 5.72 | 29.66 | 17.42 | 4.80 | 1.00 | 1.48 | 14.86 | 8.98  | 1.68 | 9.06 | 14.73 | 4.33 | 1.17 | 0.81 | 12.59        | 5.76 | 1.95 | 0.81 | 17.96      | 2.47 | 1.16 | 1.79 |
| Chlorophyll a                                 | 10.90 | 20.50 | 0.30 | 0.10  | 8.70  | 5.20 | 0.80 | 0.00 | 14.30 | 13.70 | 4.90 | 0.10 | 6.00  | 3.70 | 3.90 | 0.00 | 5.00         | 5.10 | 0.30 | 0.50 | 11.00      | 5.20 | 0.30 | 0.20 |
| Chlorophyll b                                 | 12.80 | 26.30 | 0.20 | 0.00  | 11.20 | 6.50 | 1.00 | 0.50 | 14.30 | 13.60 | 5.90 | 0.00 | 7.30  | 4.50 | 4.70 | 0.00 | 5.80         | 6.40 | 0.20 | 0.70 | 12.60      | 6.60 | 0.20 | 0.20 |
